# Supplementary material for: Hollow porous prismatic graphitic carbon nitride with nitrogen vacancies and oxygen doping: a high-performance visible light-driven catalyst for nitrogen fixation
Source: Royal Society of Chemistry journal article supplement (doi:10.1039/c9nr08705b), 2019-12-16
Supplement: c9nr08705b1.pdf [file c9nr08705b1.pdf]

## *Supplementary Information*

Hollow porous prismatic graphitic carbon nitride with nitrogen vacancies and oxygen  
doping: a high-performance visible light-driven catalyst for nitrogen fixation

Ting Huang<sup>a,b</sup>, Shugang Pan<sup>a</sup>, Lingling Shi<sup>a</sup>, Aiping Yu<sup>b</sup>, Xin Wang<sup>a,\*</sup> and Yongsheng Fu<sup>a,\*</sup>

<sup>a</sup> Key Laboratory for Soft Chemistry and Functional Materials of Ministry of Education, Nanjing  
University of Science and Technology, Nanjing 210094, China

<sup>b</sup> Waterloo Institute for Nanotechnology, University of Waterloo, Waterloo, Ontario N2L3G1,  
Canada

\* Corresponding authors

E-mail addresses: fuyongsheng0925@163.com, fuyongsheng@njust.edu.cn (Y. S. Fu),  
wangx@njust.edu.cn (X. Wang)

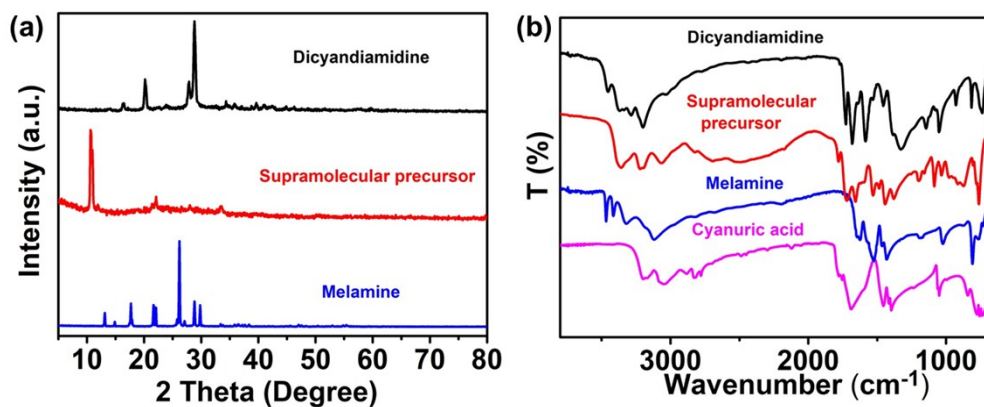

**Fig. S1** (a) X-ray diffraction (XRD) of the dicyandiamidine, supramolecular precursor, melamine and cyanuric acid. (b) FT-IR spectra of the dicyandiamidine, melamine and supramolecular precursor.

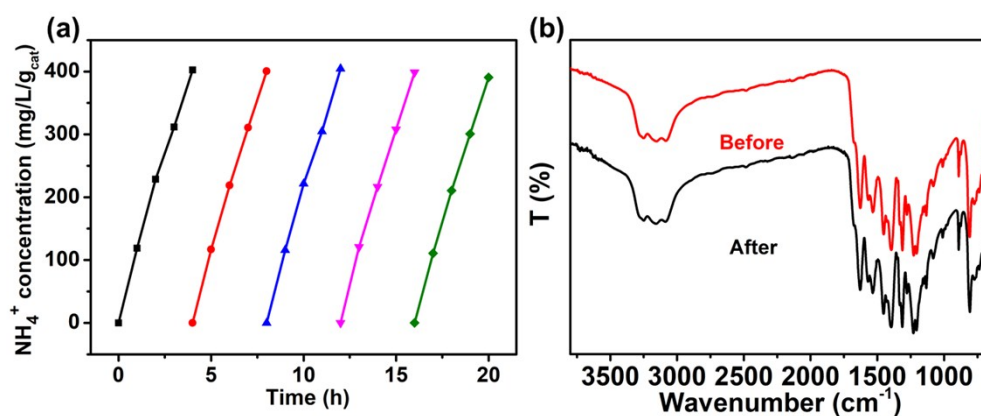

**Fig. S2** (a) The cycling testing of the photocatalytic activity over 20 h for Nv&Od-CN under the visible light irradiation ( $\lambda > 420$  nm), (b) FI-IR spectra of Nv&Od-CN before and after reaction.

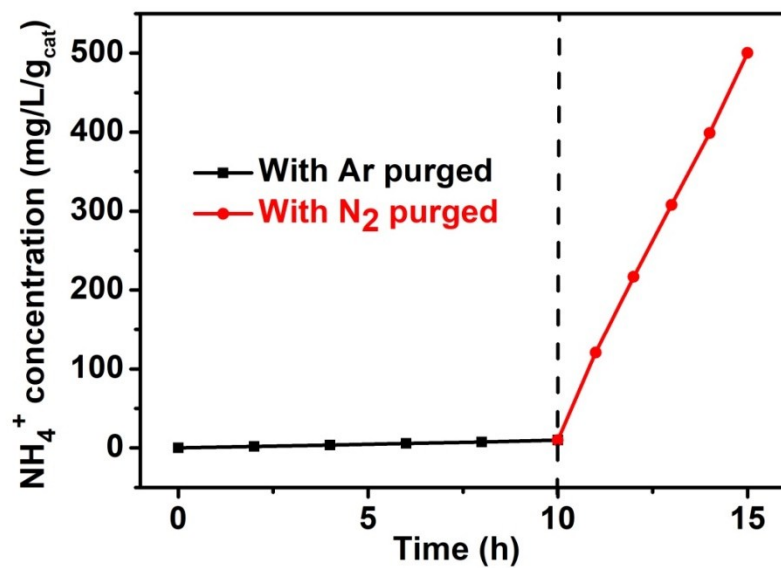

**Fig. S3** Photocatalytic nitrogen fixation for Nv&Od-CN under the visible light irradiation ( $\lambda > 420$  nm) with Ar purged or N<sub>2</sub> purged.

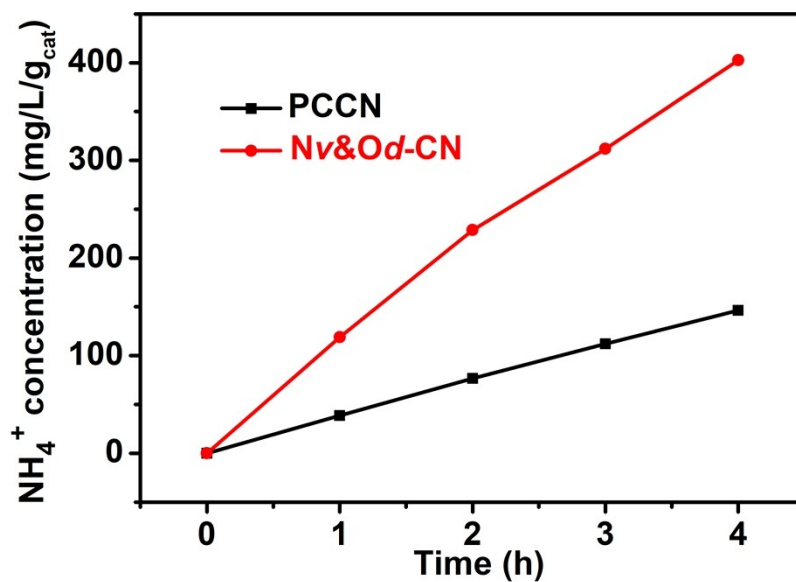

**Fig. S4** Photocatalytic nitrogen fixation for PCCN and Nv&Od-CN under the visible light irradiation ( $\lambda > 420$  nm).

The porous crimped graphitic carbon nitride (PCCN) with a large specific surface area

(146.14 m<sup>2</sup> g<sup>-1</sup>) was prepared based on our previous work (*Appl. Surf. Sci.* 2019, 480: 888–895) and was used as the contrast sample, which has neither nitrogen vacancies nor oxygen doping for the PCCN. The photocatalytic nitrogen fixation performances over the Nv&Od-CN and PCCN have been carried out under visible-light irradiation at room temperature and the results are shown in Fig. S4. It is noteworthy that although both the PCCN and Nv&Od-CN possess large specific surface area, the nitrogen fixation rate of PCCN is obviously lower than that of Nv&Od-CN, indicating that the change of specific surface area is not a mainly factor for improving photocatalytic nitrogen fixation performance.

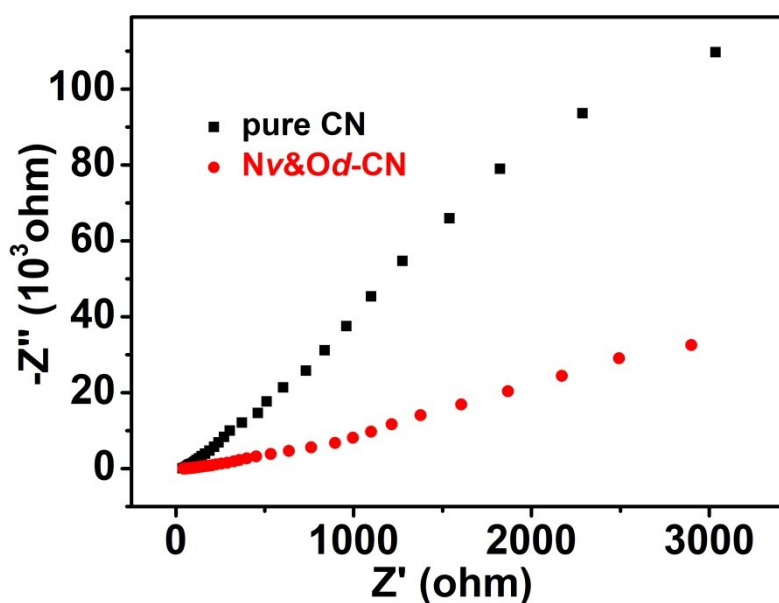

**Fig. S5** EIS Nyquist plots of the pure CN and Nv&Od-CN.

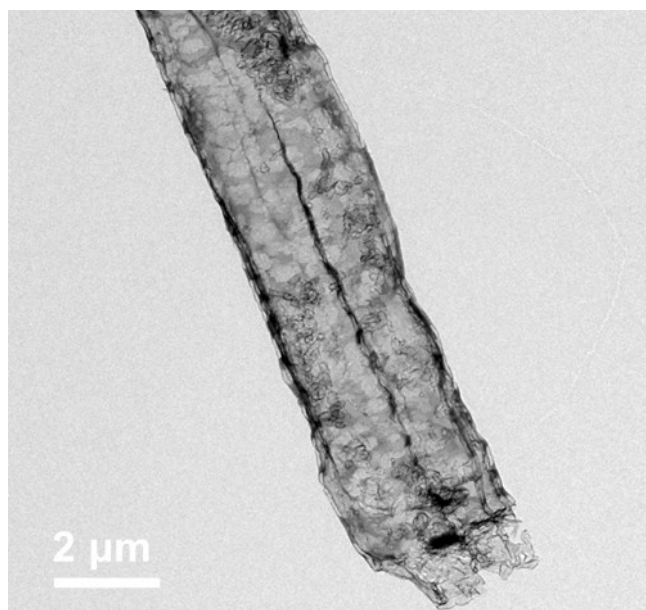

**Fig. S6** TEM images of CN1.

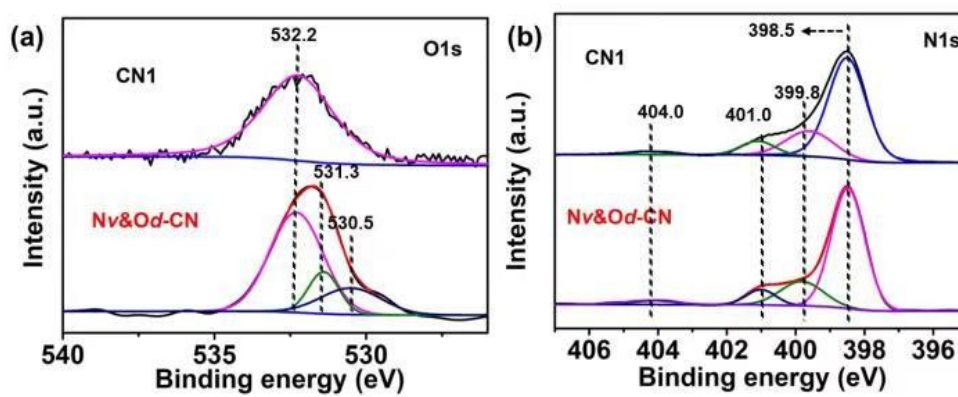

**Fig. S7** (a) XPS high resolution O 1s and (b) N 1s spectra for CN1 and Nv&Od-CN.

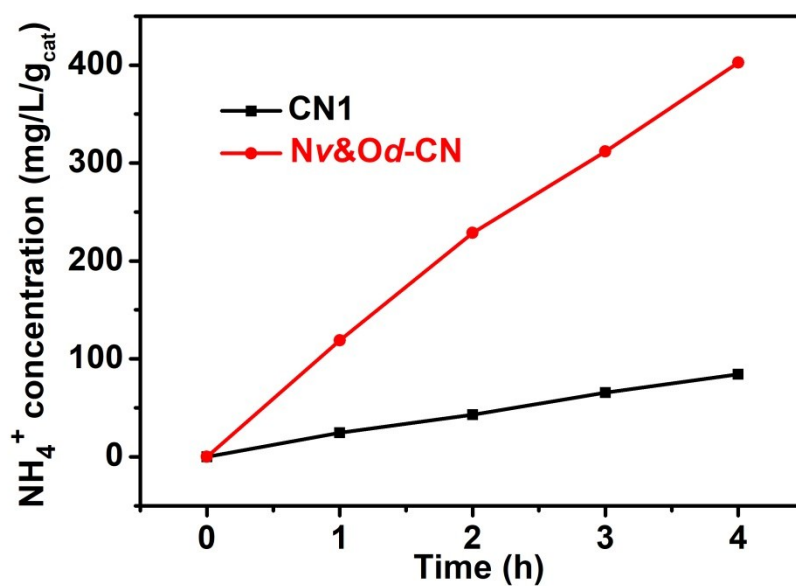

**Fig. S8** Photocatalytic nitrogen fixation for CN1 and Nv&Od-CN under the visible light irradiation ( $\lambda > 420$  nm).

**Table S1** Elemental analysis of the pure CN and Nv&Od-CN.

| Samples  | N (wt.%) | C (wt.%) | H (wt.%) | O (wt.%) |
|----------|----------|----------|----------|----------|
| Pure CN  | 55.31    | 42.18    | 2.37     | 0.17     |
| Nv&Od-CN | 51.76    | 41.08    | 1.93     | 5.23     |

**Table S2** The peak areas of N species of the pure CN and Nv&Od-CN.

| Samples  | N <sub>2C</sub> area | N <sub>3C</sub> area | N <sub>NHx</sub> area |
|----------|----------------------|----------------------|-----------------------|
| Pure CN  | 35713                | 11702                | 3423                  |
| Nv&Od-CN | 33048                | 8553                 | 3697                  |

## References

- 1 T. Huang, Y.S. Fu, Q. Peng, C.Y. Yu, J.W. Zhu, A.P. Yu and X. Wang, *Appl. Surf. Sci.*, 2019, **480**, 888–895.
